# Supplementary material for: Hyaluronidase-Responsive Mesoporous Silica Nanoparticles with Dual-Imaging and Dual-Target Function
Source: PubMed Central journal article supplement (PMC6562767; doi:10.3390/cancers11050697), 2019-05-20
Supplement: cancers-11-00697-s001.pdf [file cancers-11-00697-s001.pdf]

## Supplementary Materials

# Hyaluronidase-Responsive Mesoporous Silica Nanoparticles with Dual-Imaging and Dual-Target Function

**Table S1.** Hydrodynamic size and zeta potential for MSN-EuGd and functionalized MSN-EuGd.

|                    | MSN-EuGd | MSN-EuGd-NH | MSN-EuGd-TAT | MSN-EuGd-TAT-HA |
|--------------------|----------|-------------|--------------|-----------------|
| Zetapotential (mV) | -14.5    | -10.5       | 4.08         | -17.3           |
| Particle size (nm) | 271.2    | 279.9       | 381.1        | 457.5           |

**Table S2.** ICP-MS analyze of MSN and MSN-EuGd.

| Sample   | Eu    | Gd    |
|----------|-------|-------|
| MSN      | 0%    | 0%    |
| MSN-EuGd | 1.06% | 1.02% |

**Table S3.** TGA for the MSN-EuGd@CPT-TAT-PEG-FA.

| MSN-EuGd   | -NH <sub>2</sub> | -TAT  | @CPT  | -HA   |
|------------|------------------|-------|-------|-------|
| Weight (%) | 11.44            | 2.56  | 1.5   | 6.15  |
| mg/g       | 129.17           | 26.27 | 15.22 | 65.53 |

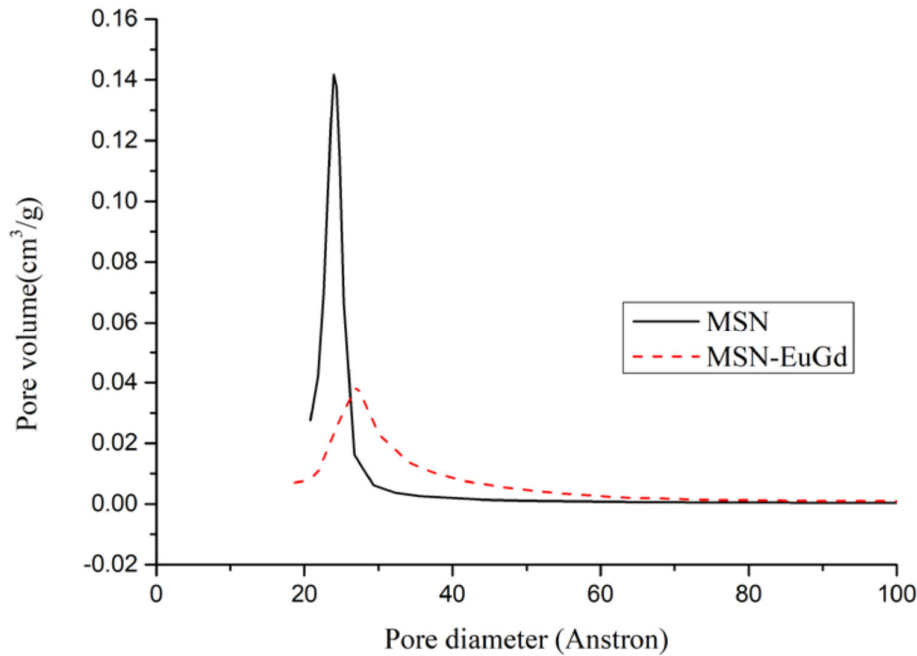

**Figure S1.** BJH pore size distribution of MSN and MSN-EuGd.

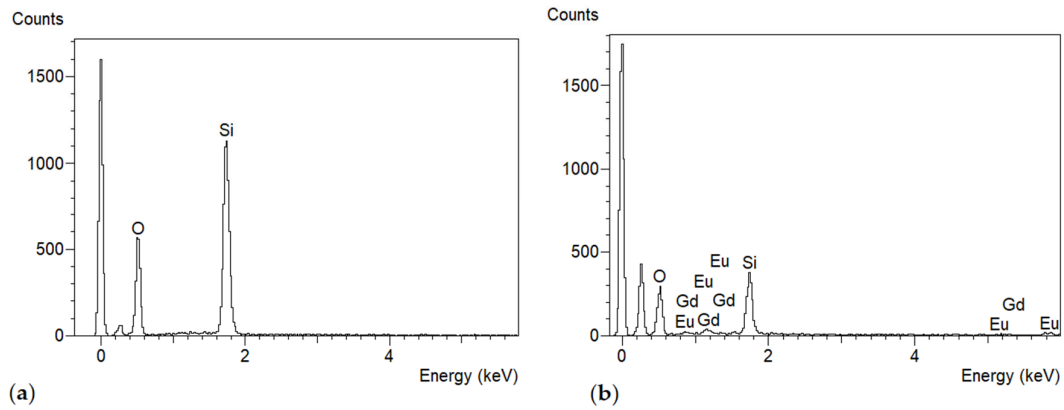

**Figure S2.** EDX spectral analyses of the (a) MSN and (b) MSN-EuGd.

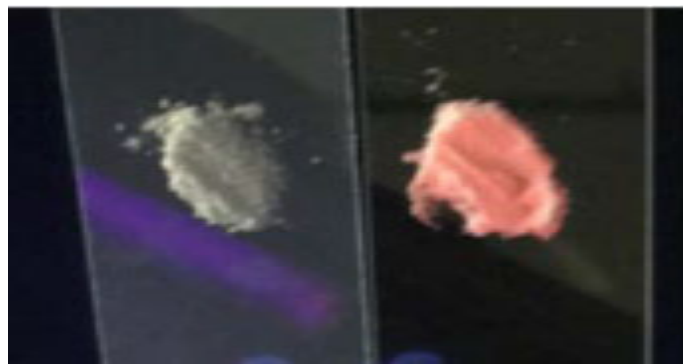

**Figure S3.** MSN and MSN-EuGd powder taken under illumination by a 254 nm UV lamp.

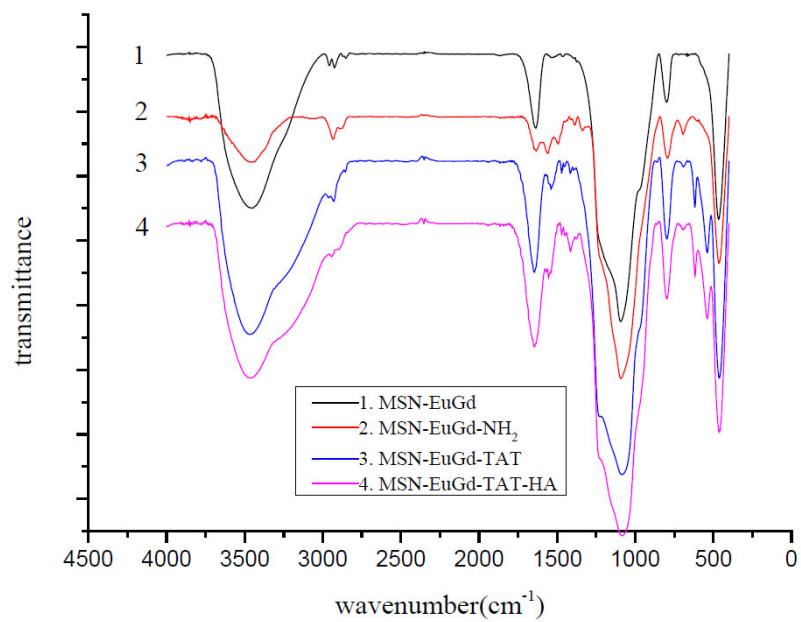

**Figure S4.** FTIR spectrum of MSN-EuGd and functionalized MSN-EuGd.

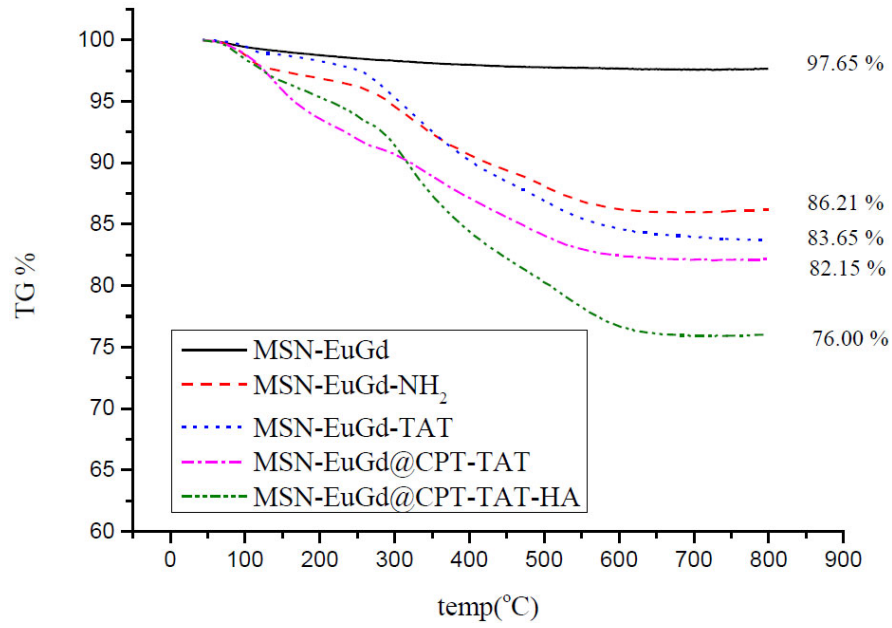

**Figure S5.** TGA patterns for the MSN-EuGd and functionalized MSN-EuGd.
